# Supplementary material for: Dyeing Non-Recyclable Polyethylene Plastic with Photoacid Phycocyanobilin from Spirulina Algae: Ultrafast Photoluminescence Studies
Source: MDPI journal article supplement (doi:10.3390/polym14224811), 2022-11-09
Supplement: s1 [file s1]

# SUPPORTING INFORMATION

*Maryam Alhefeiti,<sup>1</sup> Falguni Chandra,<sup>1</sup> Ravindra Kumar Gupta,<sup>2</sup> Na'il Saleh.<sup>1\*</sup>*

*<sup>1</sup> Department of Chemistry, College of Science, United Arab Emirates University, Al Ain P.O. Box 15551, United Arab Emirates*

*<sup>2</sup> King Abdullah Institute for Nanotechnology, King Saud University, Riyadh 11451, Saudi Arabia*

*<sup>§</sup>Equal contribution*

## TABLE OF CONTENTS

|                                                                      |            |
|----------------------------------------------------------------------|------------|
| <b>Part 1: PL, PLE, and TRPL Spectra.....</b>                        | <b>S3</b>  |
| PL and PLE Spectra of PCB in neat solvents .....                     | S3         |
| TRPL Spectra of PCB in neat solvents .....                           | S5         |
| Table S1: Solvent Properties.....                                    | S7         |
| <b>Part 2: XPS Spectra .....</b>                                     | <b>S8</b>  |
| XPS Spectra of PCB-Sensitized Nafion .....                           | S8         |
| XPS Spectra of PCB-Sensitized LDPE.....                              | S11        |
| <b>Part 3: Loading Characterization.....</b>                         | <b>S13</b> |
| Calibration Curves and Loading Measurements .....                    | S12-13     |
| <b>Part 4: PL and Time-Resolved PL Spectra.....</b>                  | <b>S14</b> |
| Changes of PL spectra of PCB-Sensitized Electrolytic Membranes ..... | S14        |
| PL decays of solid PCB@LDPE films .....                              | S15-17     |
| <b>Part 5: Thermal Stability .....</b>                               | <b>S18</b> |
| DSC curve of solid PCB@LDPE films .....                              | S18        |
| <b>Part 6: Absolute Quantum Yield Measurements.....</b>              | <b>S19</b> |
| PL and PLE Spectra of solid PCB@LDPE films .....                     | 19         |
| <b>References .....</b>                                              | <b>S20</b> |

## Part 1: PL and PLE Spectra

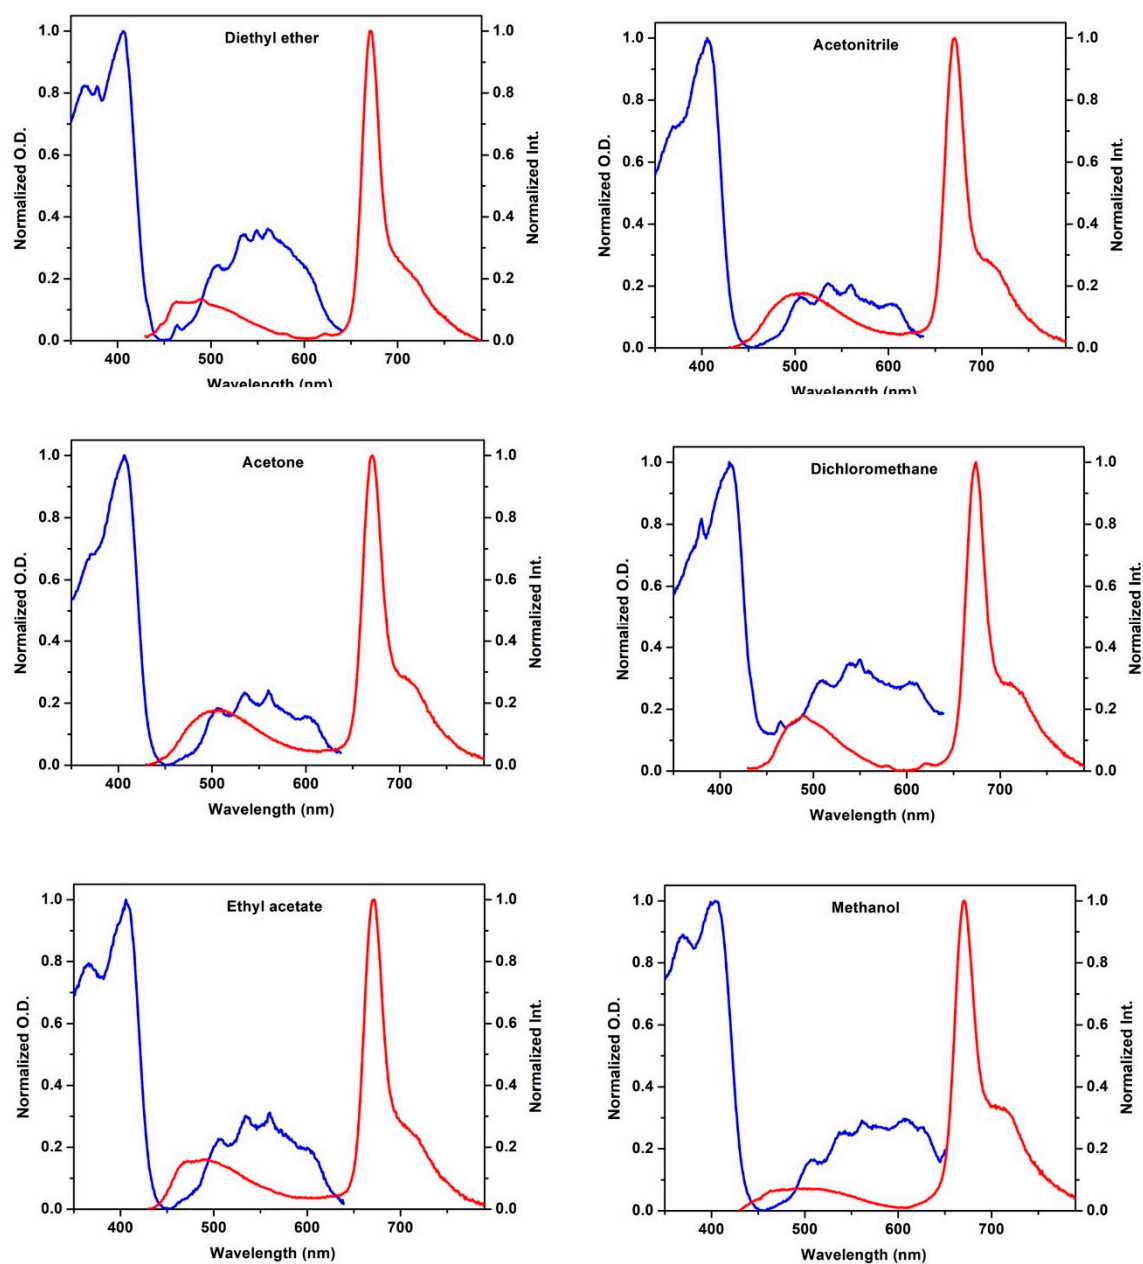

**Figure S1.** PLE (blue) and PL (red) spectra ( $\lambda_{\text{exc}} = 400$  nm and  $\lambda_{\text{mon}} = 672$  nm) of PCB dye in different solvents at 298 K. The name of the solvent is directly indicated in the paragraph.

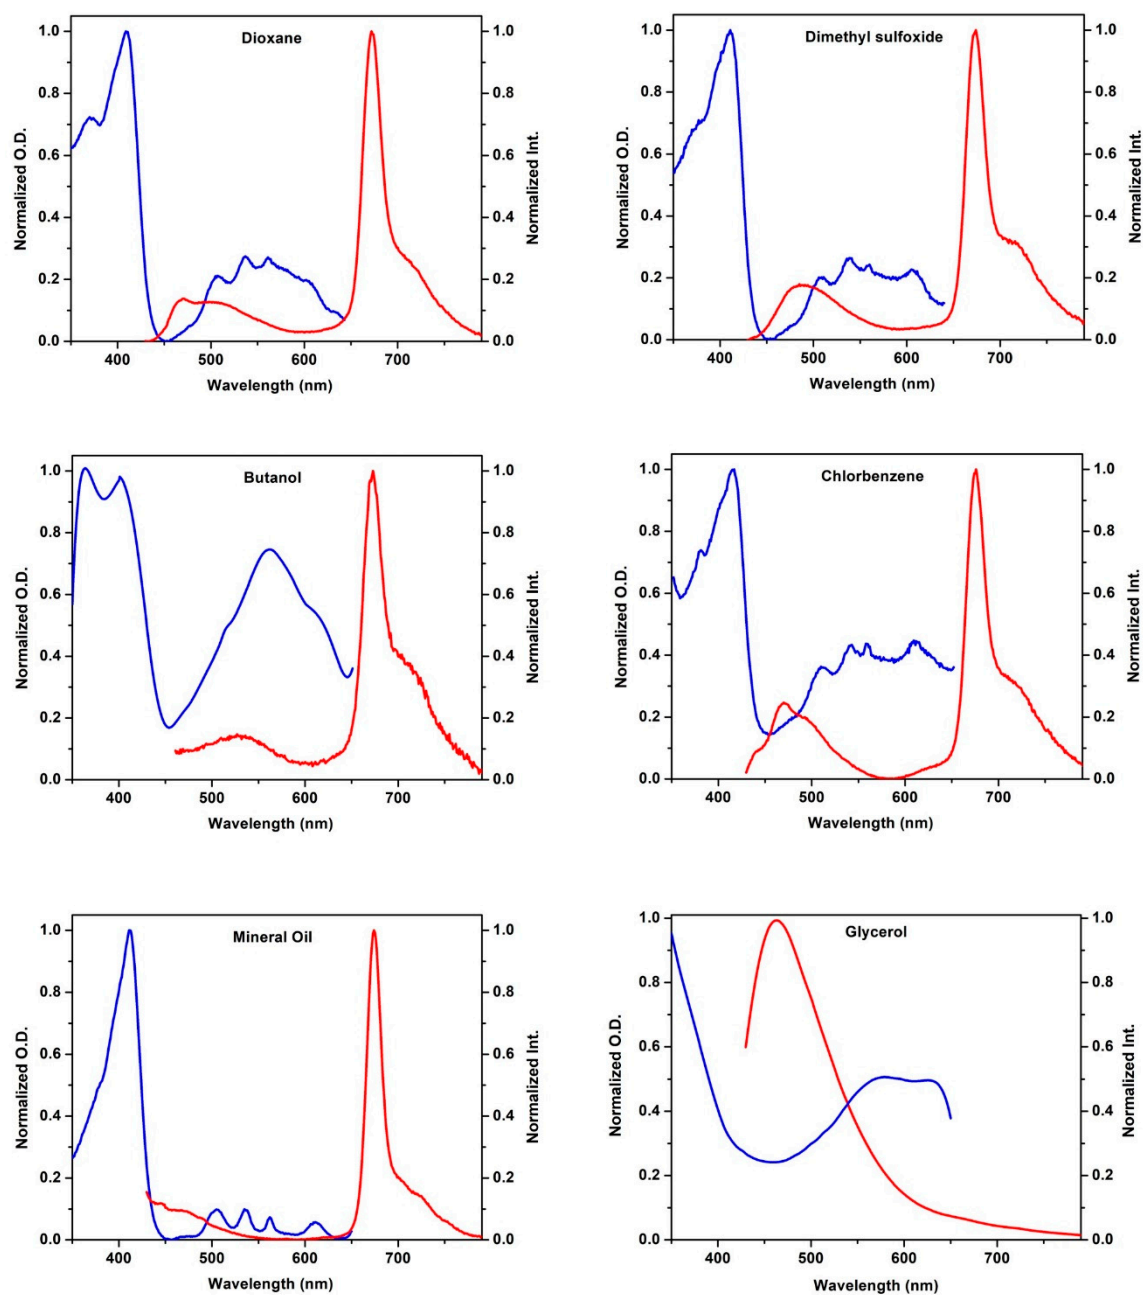

Figure S1. Continued.

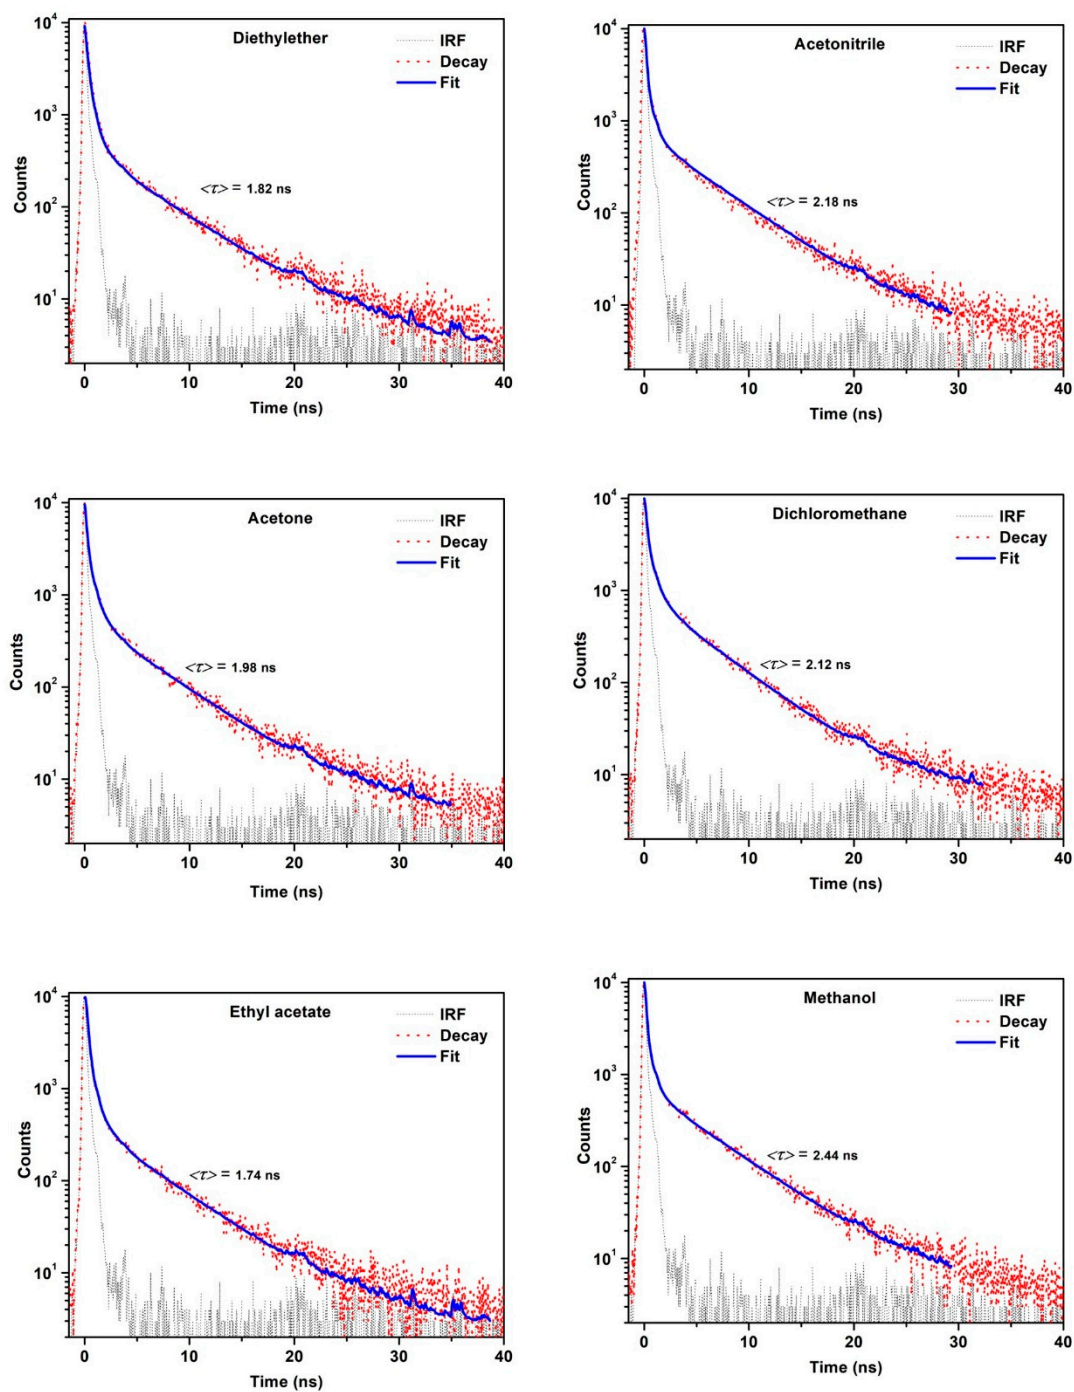

**Figure S2.** PL decays (red) at 672 nm and the three-exponentials nonlinear fitting (red) spectra ( $\lambda_{\text{exc}} = 510$  nm with 30 picoseconds time-resolution) of PCB dye in different solvents at 298 K. The name of the solvent and the average lifetime values are directly indicated in the paragraph. The instrument response function (IRF; gray) is also shown in the paragraph.

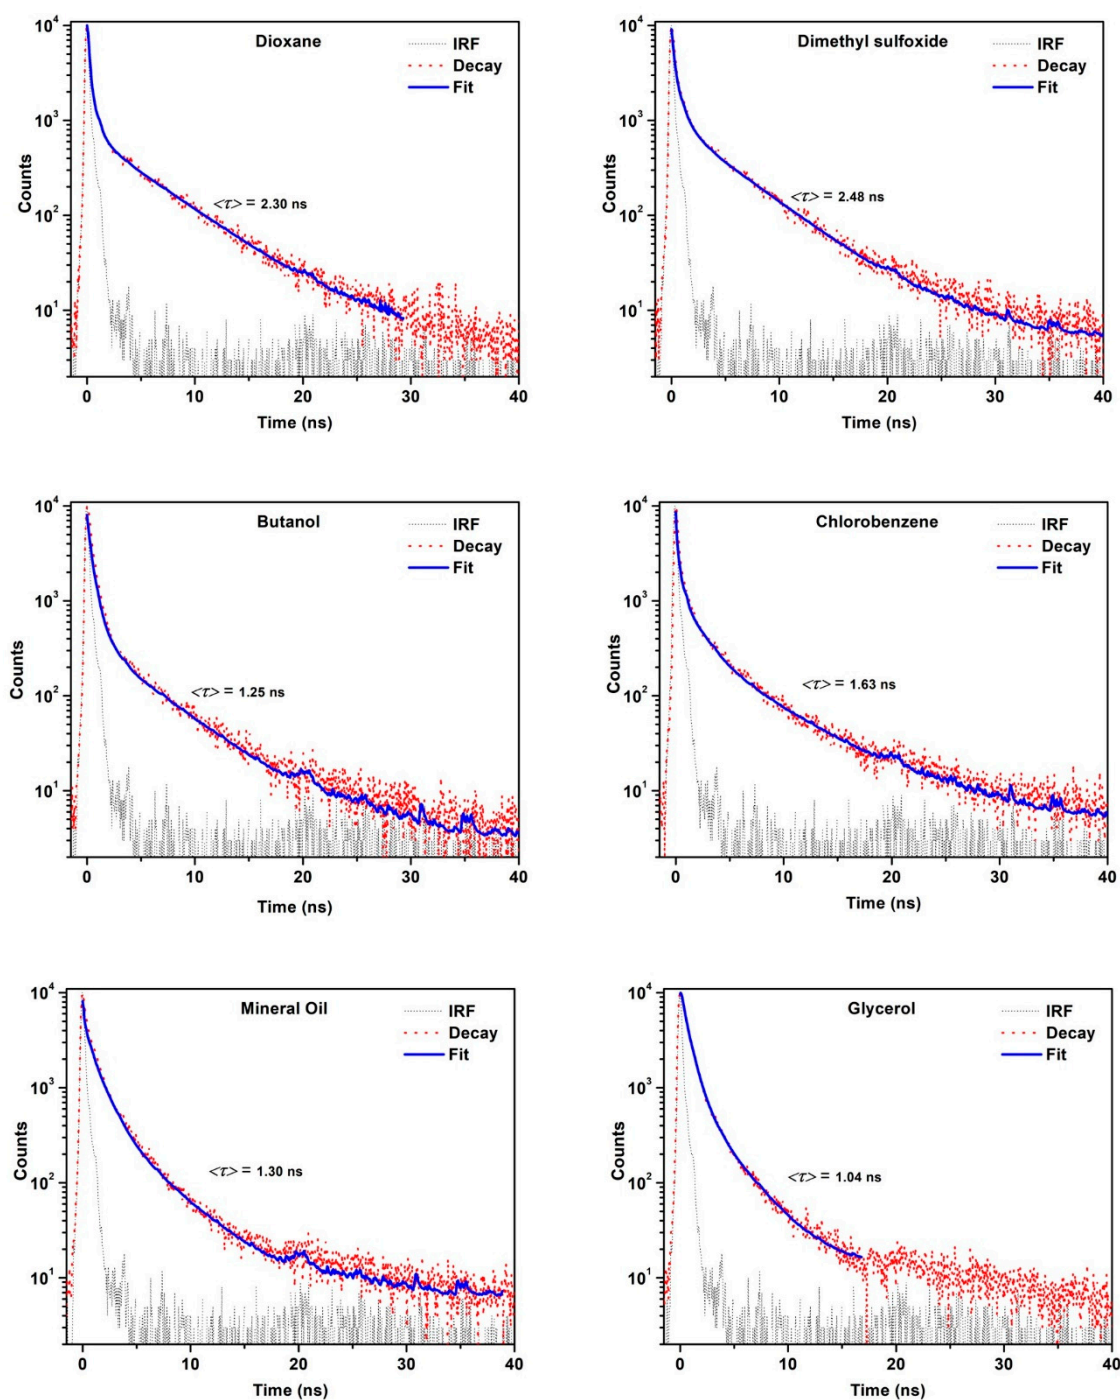

Figure S2. Continued.

**Table S1.** Solvent properties: refractive index ( $n$ ), dielectric constant ( $\epsilon$ ), orientational polarizability ( $\Delta f$ ), viscosity ( $\eta$ ), hydrogen bond accepting ability ( $\beta$ ), hydrogen bond donating ability ( $\alpha$ ), and polarity/polarizability parameter ( $\pi^*$ ).

| Solvents            | $n$   | $\epsilon$ | $\Delta f$ | $\alpha$ | $\beta$ | $\pi^*$ | $\alpha + \beta + \pi^*$ |
|---------------------|-------|------------|------------|----------|---------|---------|--------------------------|
| Diethyl ether       | 1.352 | 4.33       | 0.17       | 0        | 0.47    | 0.27    | 0.74                     |
| Acetonitrile        | 1.344 | 37.5       | 0.31       | 0.19     | 0.31    | 0.75    | 1.25                     |
| Acetone             | 1.35  | 20.70      | 0.29       | 0.08     | 0.48    | 0.71    | 1.27                     |
| Dichloromethane     | 1.416 | 8.93       | 0.22       | 0.33     | 0       | 0.82    | 1.15                     |
| Ethyl Acetate       | 1.37  | 6.02       | 0.17       | 0        | 0.45    | 0.45    | 0.90                     |
| Methanol            | 1.328 | 32.7       | 0.31       | 0.93     | 0.62    | 0.6     | 2.15                     |
| Dioxane             | 1.422 | 2.22       | 0.02       | 0        | 0.37    | 0.55    | 0.92                     |
| Dimethyl sulphoxide | 1.479 | 48.9       | 0.26       | 0        | 0.76    | 1       | 1.76                     |
| Butanol             | 1.394 | 17.85      | 0.27       | 0.79     | 0.88    | 0.47    | 2.14                     |
| Chlorobenzene       | 1.52  | 5.62       | 0.14       | 0        | 0.44    | 0.19    | 0.63                     |
| Mineral Oil         | 1.47  | 2.22       | 0.01       | NA       | NA      | NA      | NA                       |
| Glycerol            | 1.46  | 46.50      | 0.27       | 0.93     | 0.67    | 0.04    | 1.64                     |

NA: not applicable.

## Part 2: XPS and PL Spectra

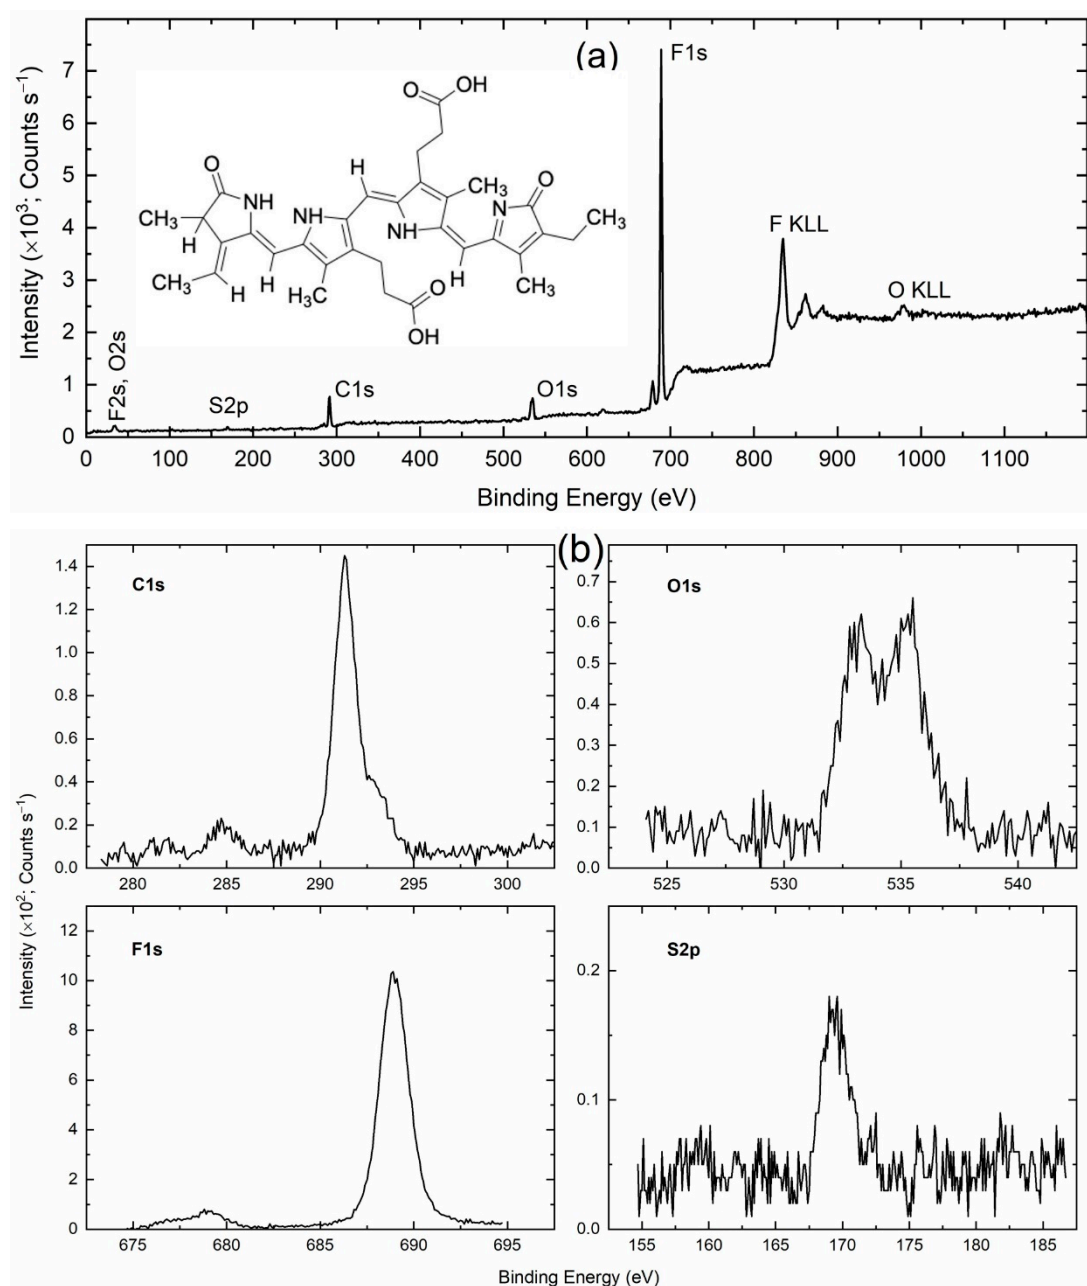

**Figure S3.** XPS spectra for (a) survey and (b) elements (C1s, O1s, F1s, and S2p) of PCB-sensitized Nafion. The *inset* shows the chemical structure of PCB.



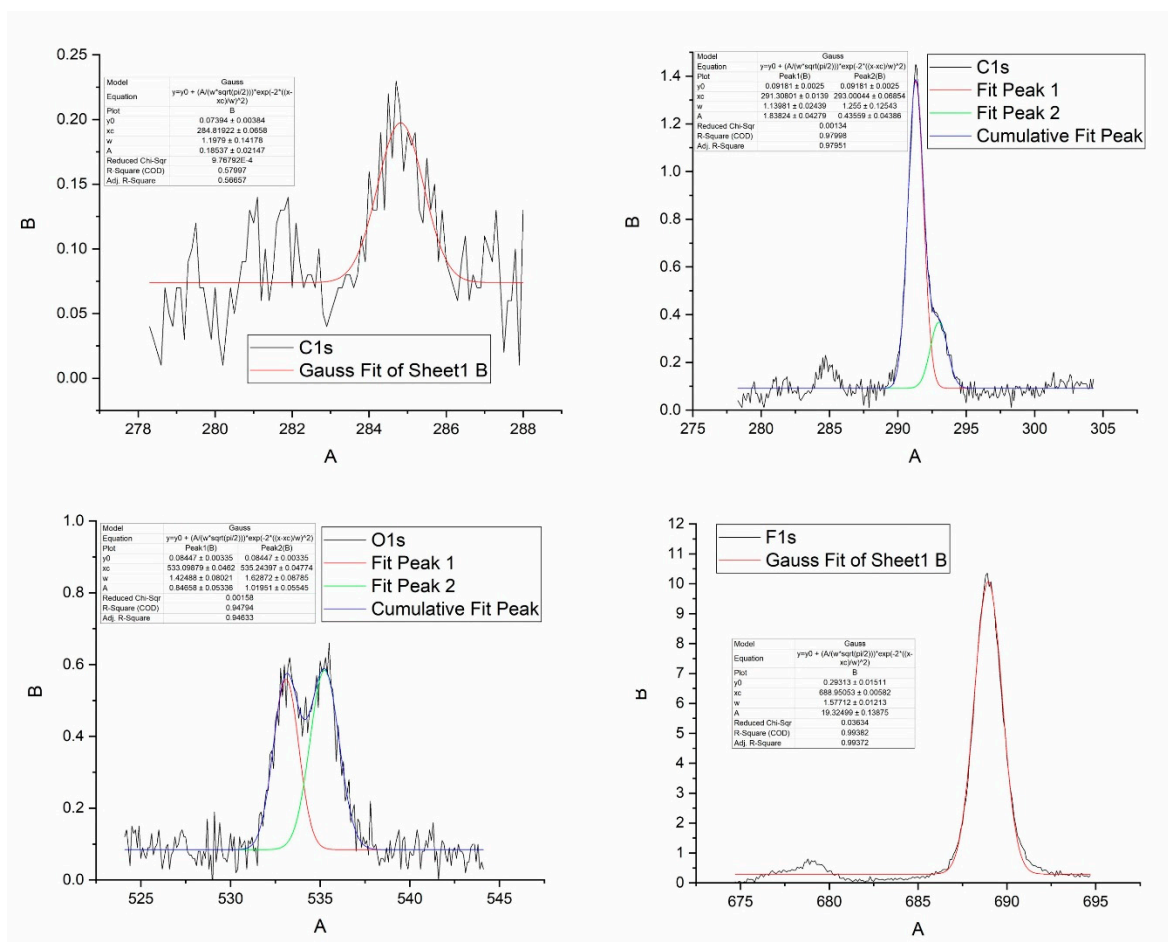

**Figure S4.** Best fit for elements (C1s, O1s, F1s, and S2p) of PCB-sensitized Nafion.

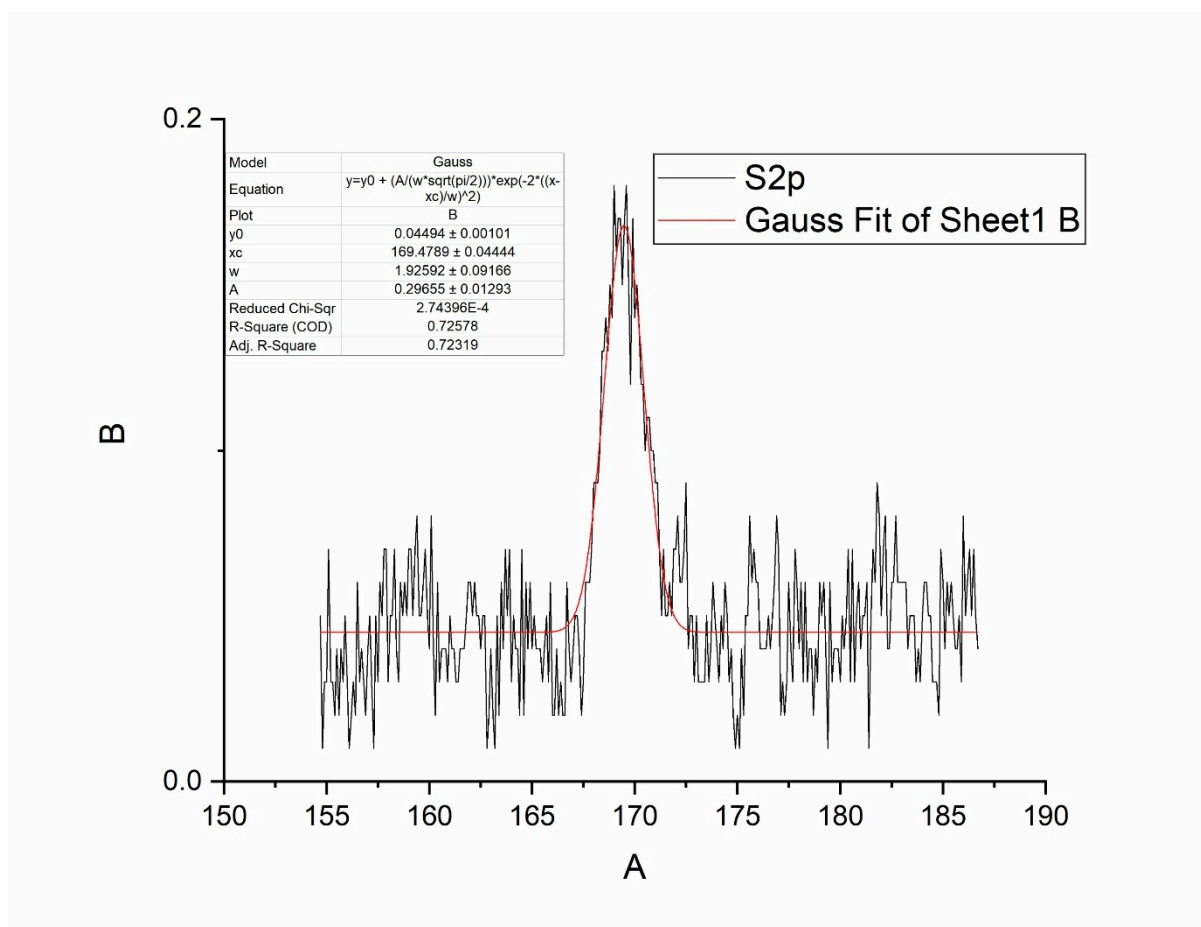

**Figure S4.** Continued.

**Table S2.** Binding energy in eV for elements (C1s, O1s, F1s, and S2p) of PCB-sensitized Nafion.

|     |                                                                                                           |
|-----|-----------------------------------------------------------------------------------------------------------|
| C1s | 284.8 (284.8, C–C) <sup>†</sup> ;<br>291.3 (292.2, –CF <sub>2</sub> –);<br>293 (294.4, –CF <sub>3</sub> ) |
| O1s | 533.1 (533, –SO <sub>3</sub> <sup>–</sup> ) <sup>†,§</sup> ;<br>535.2 (535.7, –CF <sub>2</sub> –O–CF–)    |
| F1s | 688.9 (689, C–F) <sup>†</sup>                                                                             |
| S2p | 169.5 (170, –SO <sub>3</sub> <sup>–</sup> ) <sup>†</sup>                                                  |

<sup>†</sup> [1,2], <sup>§</sup> [3]

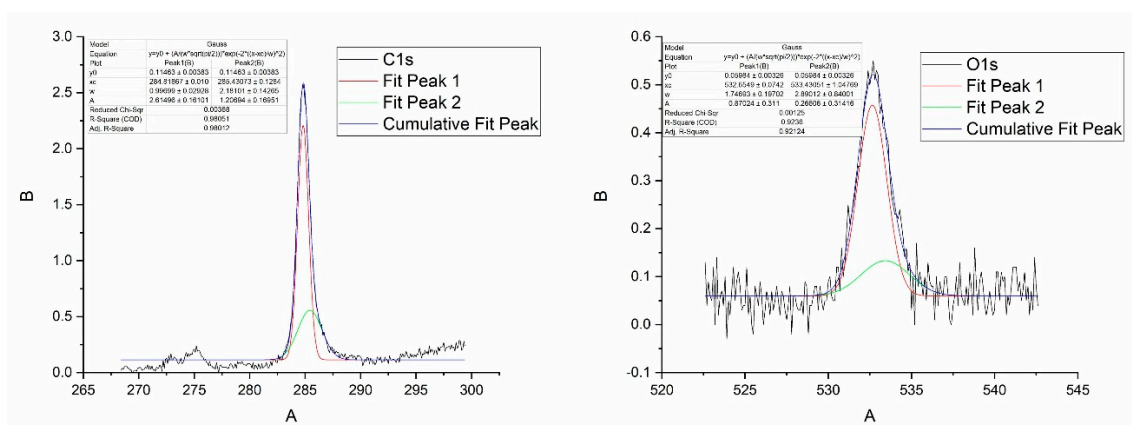

**Figure S5.** Best fit for elements (C1s and O1s) of PCB-sensitized LDPE.

**Table S3.** Binding energy in eV for elements (C1s and O1s) of PCB-sensitized LDPE.

|     |                                                                    |
|-----|--------------------------------------------------------------------|
| C1s | 284.8 (284.6, C–C) <sup>‡</sup> ;<br>285.4 (286, C–O) <sup>§</sup> |
| O1s | 532.6; 533.4 (C=O; COOH) <sup>§</sup>                              |

<sup>‡</sup> [4], <sup>§</sup> [3]

### Part 3: Loading Characterization

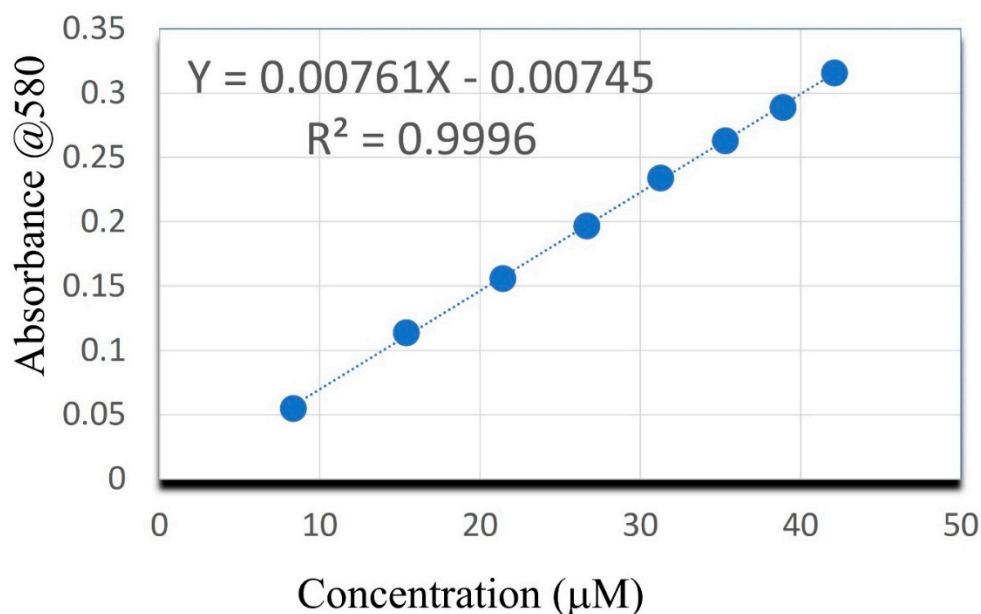

**Figure S6.** The standard equation and the calibration curves obtained from UV–visible absorption spectra were measured for different concentrations of PCB dye in methanol at 298 K.

**Table S4.** Mass-of-balance Analysis.

| Y (Absorbance) | X =[PCB] (μM) | C <sub>PCB</sub><br>(μM) | [PCB@LDPE] (μM)      | Weight (g) of PCB ± 0.001 <sup>§</sup> |
|----------------|---------------|--------------------------|----------------------|----------------------------------------|
| ~0             | ~0            | < 10                     | < 10 (in 0.002 L)    | < 0.000012 (in 0.002 L)                |
| 0.360545       | 48.36         | 100                      | 51.64 (in 0.002 L)   | 0.000060 (in 0.002 L)                  |
| 0.405661       | 54.28         | 1000                     | 945.72 (in 0.0017 L) | 0.000942 (in 0.0017 L)                 |

<sup>§</sup>Total amount used of PCB = 0.001000 g (molecular weight = 585.714 g/mol)

The concentrations (number of moles) of PCB dye in the remaining and washed-out solutions ([PCB]) after the loading step (Experimental Section) were calculated by replacing Y (Figure S6) in the standard equation S1 by the absorbance at 580 nm for a given solution (Table S4).

$$X = \frac{Y+0.00745}{0.00761} \quad (\text{Equation S1})$$

The following mass-of-balance (equation S2) was then used to calculate the amount of PCB on top of LDPE film (Table S4: **Weight (g) of PCB**).

$$C_{\text{PCB}} = [\text{PCB}] + [\text{PCB@LDPE}] \quad (\text{Equation S2})$$

, where  $C_{\text{PCB}}$  is the total concentration of PCB,  $[\text{PCB}]$  is the concentration of the unbound PCB, and  $[\text{PCB@LDPE}]$  is the concentration of the adsorbed dye onto the plastic surface.

**Table S5.** Properties of Plastic Films.

| Plastic film | Thickness (mm) $\pm 0.001$ | $C_{\text{PCB}}$ ( $\mu\text{M}$ ) | Area ( $\text{mm}^2$ ) $\pm 1$ | Weight (g) $\pm 0.001$ | Color      | Dye Loading (%) (w/w) |
|--------------|----------------------------|------------------------------------|--------------------------------|------------------------|------------|-----------------------|
| LDPE         | 0.120                      | 0                                  | 100                            | 0.0293                 | Watery     |                       |
| PCB@LDPE     | 0.117                      | 100                                | 100                            | 0.0136                 | Watery     | < 0.08                |
| PCB@LDPE     | 0.118                      | 100                                | 100                            | 0.0137                 | Watery     | 0.44                  |
| PCB@LDPE     | 0.115                      | 1000                               | 100                            | 0.0136                 | Watery     | 6.92                  |
| PCB@Nafion   | 0.183                      | 1000                               | 100                            | 0.0240                 | Dark brown |                       |
| PCB@AHA      | 0.180                      | 1000                               | 100                            | 0.0478                 | Dark brown |                       |
| Nafion       | 0.170                      | 0                                  | 100                            | 0.0366                 | Watery     |                       |
| AHA          | 0.174                      | 0                                  | 100                            | 0.0172                 | Creamy     |                       |

#### Part 4: PL and Time-Resolved PL Spectra

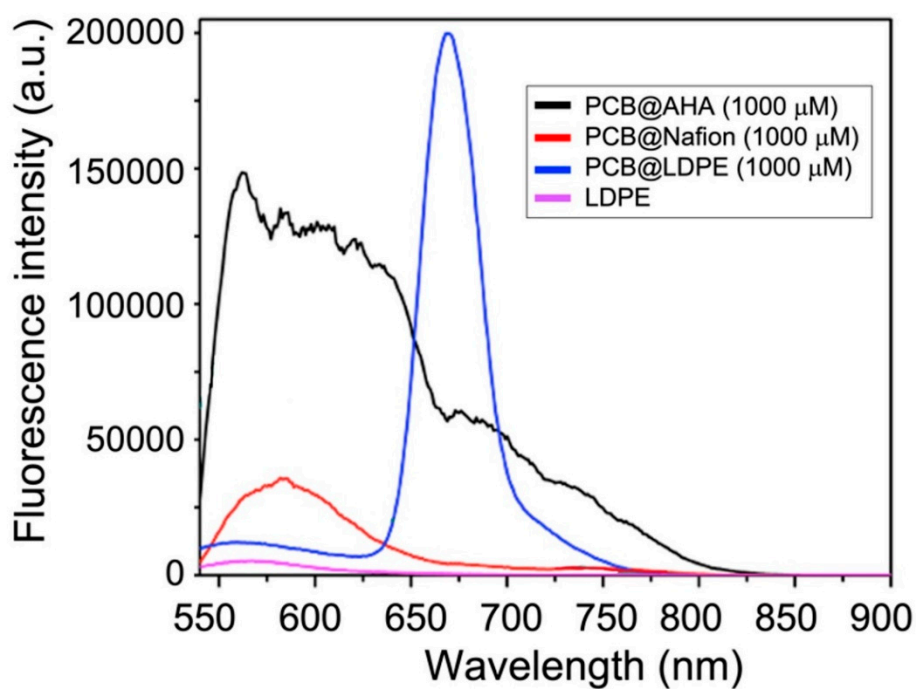

**Figure S7.** Changes of PL spectra of LDPE, Nafion, and AHA solid membranes upon the addition of different concentrations of PCB dyes in methanol under vacuum at 298 K (solid samples were excited at 510 nm)

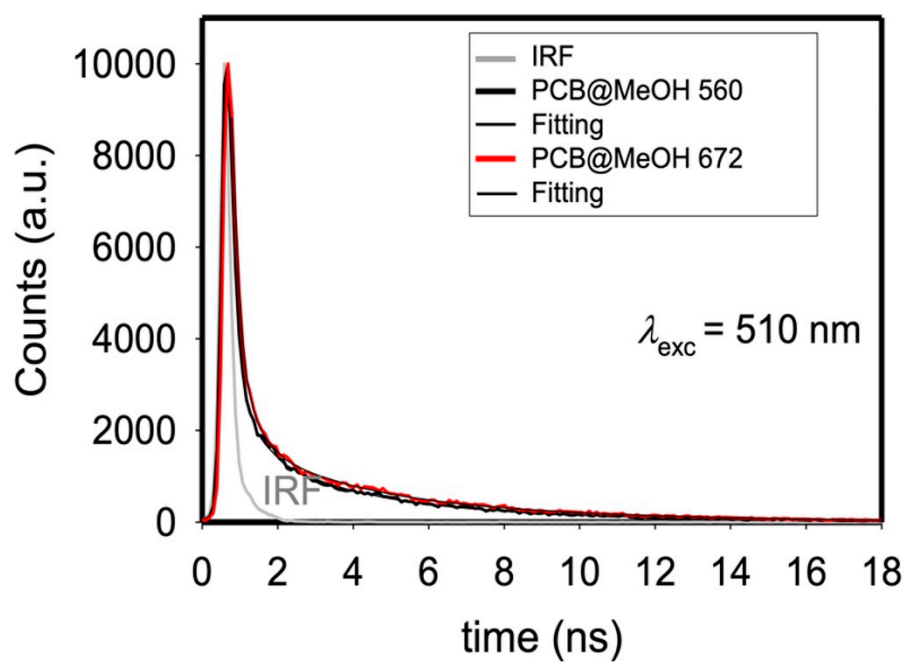

**Figure S8.** PL decays of PCB (10  $\mu$ M) in methanol at 298 K. The excitation and monitoring wavelength is indicated directly in the graph.

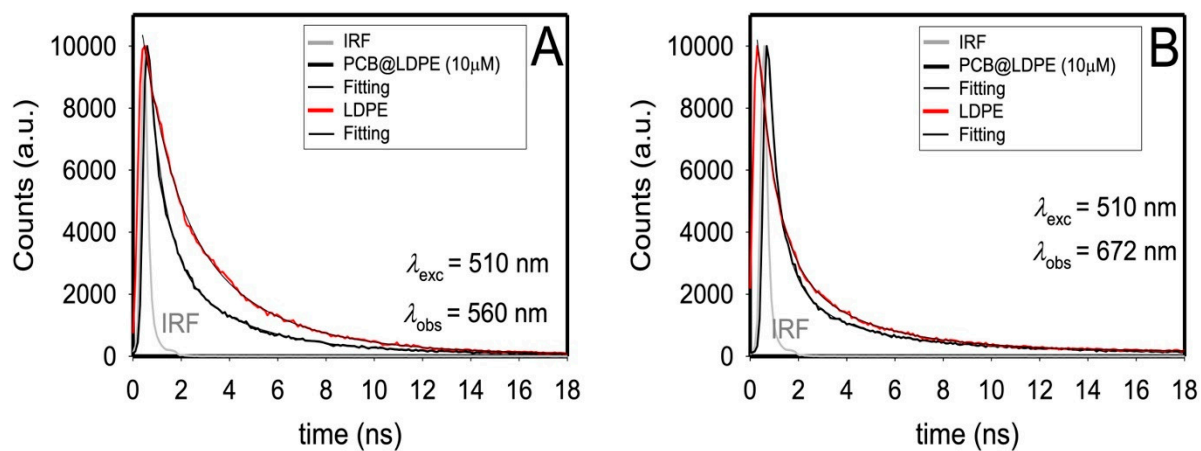

**Figure S9.** PL decays of solid PCB@LDPE films prepared upon loading PCB dyes at 10  $\mu\text{M}$  at 298 K (black lines). The excitation and monitoring wavelengths are indicated directly in the graph. The data for LDPE (red lines) are added for comparison purposes.



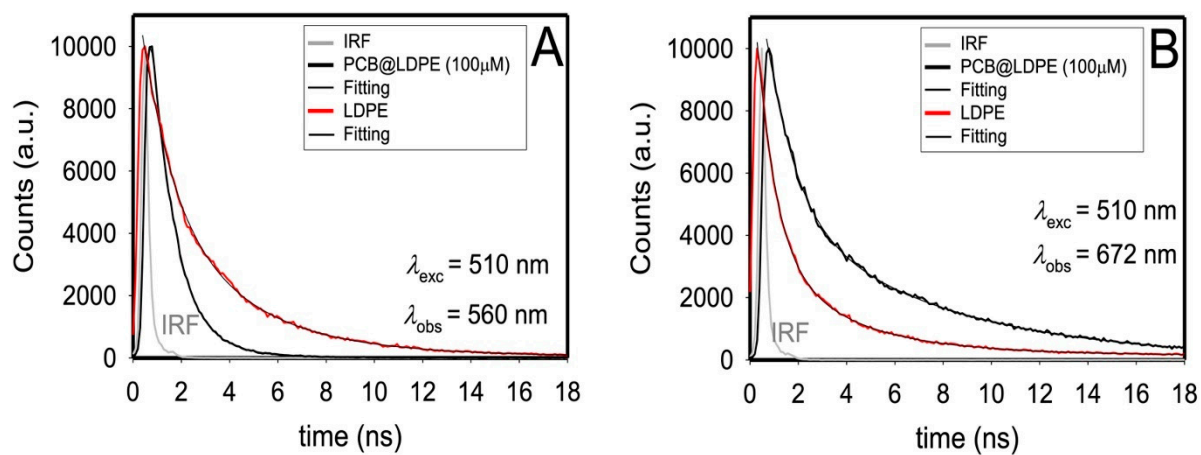

**Figure S10.** PL decays of solid PCB@LDPE films prepared upon loading PCB dyes at 100  $\mu\text{M}$  at 298 K (black lines). The excitation and monitoring wavelengths are indicated directly in the graph. The data for LDPE (red lines) are added for comparison purposes.

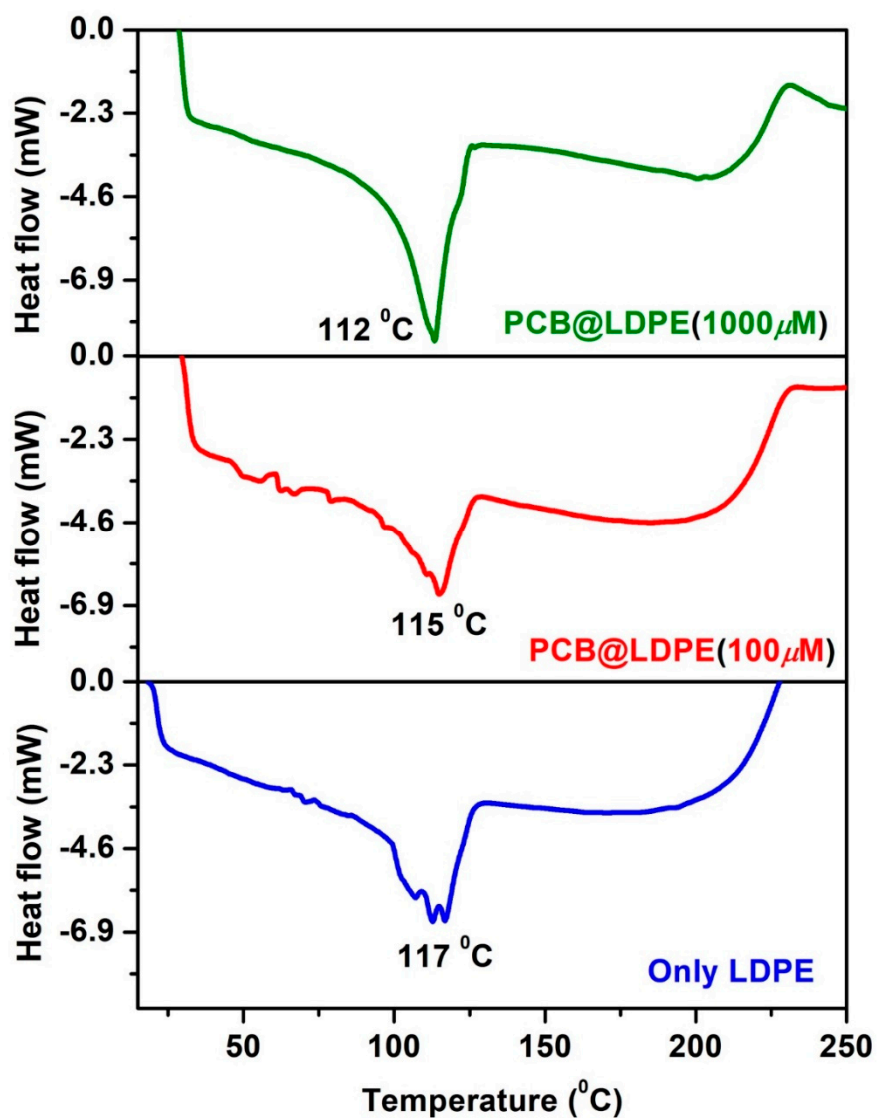

**Figure S11.** DSC curves of solid PCB@LDPE films prepared upon loading PCB dyes at 100 (red line) and 1000  $\mu$ M at 298 K (green line). The DSC curve for LDPE (blue line) was added for comparison purposes.

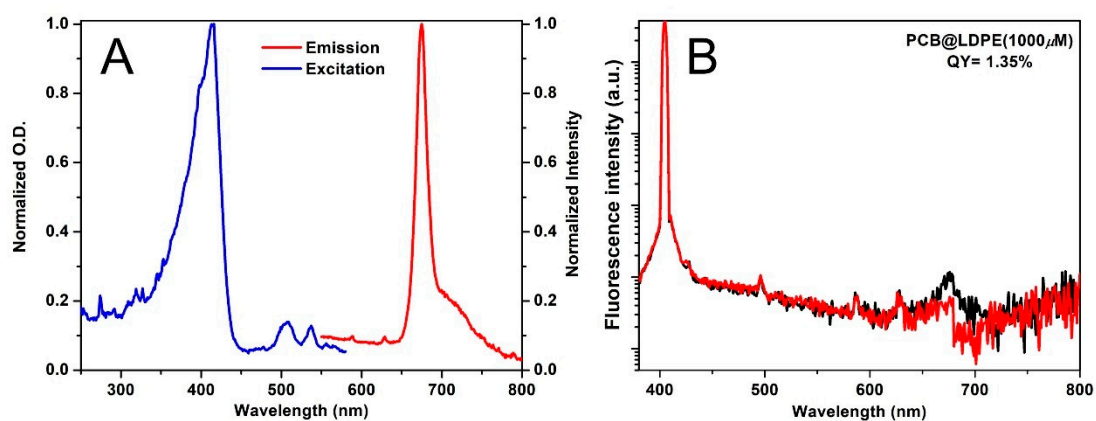

**Figure S12.** (A) PLE (blue) and PL (red) spectra ( $\lambda_{\text{exc}} = 400$  nm and  $\lambda_{\text{mon}} = 672$  nm) of solid PCB@LDPE films prepared upon loading 7% of PCB dyes at 298 K. (B) the measured Quantum Yield (QY) at 672 nm as directly indicated in the paragraph.

## References

1. Hoffmann, E.A.; Fekete, Z.A.; Korugic-Karasz, L.S.; Karasz, F.E.; Wilusz, E. Theoretical and experimental x-ray photoelectron spectroscopy investigation of ion-implanted nafion. *Journal of Polymer Science Part A: Polymer Chemistry* **2004**, *42*, 551-556.
2. Friedman, A.K.; Shi, W.; Losovyj, Y.; Siedle, A.R.; Baker, L.A. Mapping microscale chemical heterogeneity in nafion membranes with x-ray photoelectron spectroscopy. *Journal of The Electrochemical Society* **2018**, *165*, 733-741.
3. Göller, A.H.; Strehlow, D.; Hermann, G. The excited-state chemistry of phycocyanobilin: A semiempirical study. *ChemPhysChem* **2005**, *6*, 1259-1268.
4. AlMaadeed, M.A.; Nógellová, Z.; Mičušík, M.; Novák, I.; Krupa, I. Mechanical, sorption and adhesive properties of composites based on low density polyethylene filled with date palm wood powder. *Materials & Design* **2014**, *53*, 29-37.
